# Supplementary material
Source: PubMed Central journal article supplement (PMC5496794)
Supplement: NIHMS871892-supplement-supplement_1.pdf [file NIHMS871892-supplement-supplement_1.pdf]

**Supplementary Table 1: ICD-9 Codes for Biliary Procedures**

| <b>ICD-9</b>                                     | <b>Procedure</b>                                             |
|--------------------------------------------------|--------------------------------------------------------------|
| <b>Diagnostic ERCP</b>                           |                                                              |
| 51.10                                            | Diagnostic procedures on biliary tract                       |
| 51.11                                            | Endoscopic retrograde cholangiography                        |
| <b>Therapeutic ERCP</b>                          |                                                              |
| 51.14                                            | Endoscopic biopsy of biliary duct or sphincter of Oddi       |
| 51.15                                            | Pressure measurement of sphincter of Oddi                    |
| 51.64                                            | Endoscopic excision or destruction of lesion of biliary duct |
| 51.69                                            | Endoscopic excision of other bile duct                       |
| 51.84                                            | Endoscopic dilation of ampulla and biliary duct              |
| 51.85                                            | Endoscopic sphincterotomy and papillotomy                    |
| 51.86                                            | Endoscopic insertion of nasobiliary drainage tube            |
| 51.87                                            | Endoscopic insertion of stent (tube) into bile duct          |
| 51.88                                            | Endoscopic removal of stone(s) from biliary tract            |
| <b>Bile Duct Surgery</b>                         |                                                              |
| 51.32                                            | Anastomosis of gallbladder to intestine                      |
| 51.36                                            | Choledochoenterostomy                                        |
| 51.41                                            | Common duct exploration for removal of calculus              |
| 51.42                                            | Common duct exploration for relief of other obstruction      |
| 51.43                                            | Insertion of choledochohepatic tube for decompression        |
| 51.49                                            | Incision of other bile ducts for relief of obstruction       |
| 51.51                                            | Exploration of common duct                                   |
| 51.59                                            | Other incision of other bile duct                            |
| 51.71                                            | Simple suture of common bile duct                            |
| 51.72                                            | Choledochoplasty                                             |
| 51.79                                            | Repair of other bile ducts                                   |
| <b>Percutaneous Transhepatic Cholangiography</b> |                                                              |
| 51.96                                            | Percutaneous extraction of common duct stones                |
| 51.98                                            | Other percutaneous procedures on biliary tract               |

| Supplementary Table 2: Age-standardized rate of biliary procedures |       |       |       |       |       |       |       |       |       |       |       |       |       |       |       |       |
|--------------------------------------------------------------------|-------|-------|-------|-------|-------|-------|-------|-------|-------|-------|-------|-------|-------|-------|-------|-------|
| Year                                                               | 98    | 99    | 00    | 01    | 02    | 03    | 04    | 05    | 06    | 07    | 08    | 09    | 10    | 11    | 12    | 13    |
| All biliary interventions                                          |       |       |       |       |       |       |       |       |       |       |       |       |       |       |       |       |
| Rate                                                               | 119.8 | 116.2 | 110.5 | 115.1 | 112.6 | 113.5 | 105.7 | 105.0 | 107.2 | 101.4 | 108.5 | 104.9 | 106.4 | 106.5 | 102.3 | 100.1 |
| SE                                                                 | 2.6   | 2.6   | 2.5   | 2.5   | 2.5   | 2.5   | 2.3   | 3.0   | 2.8   | 3.1   | 3.1   | 2.5   | 2.7   | 2.1   | 1.3   | 1.3   |
| Diagnostic ERCP                                                    |       |       |       |       |       |       |       |       |       |       |       |       |       |       |       |       |
| Rate                                                               | 36.0  | 32.5  | 29.0  | 26.8  | 25.1  | 22.8  | 20.1  | 18.2  | 17.3  | 14.1  | 13.6  | 12.6  | 11.4  | 10.0  | 9.4   | 8.6   |
| SE                                                                 | 1.2   | 1.1   | 1.0   | 0.9   | 0.9   | 0.8   | 0.7   | 0.7   | 1.0   | 0.6   | 1.0   | 0.5   | 0.5   | 0.5   | 0.3   | 0.2   |
| Therapeutic ERCP                                                   |       |       |       |       |       |       |       |       |       |       |       |       |       |       |       |       |
| Rate                                                               | 62.0  | 64.3  | 63.9  | 72.2  | 71.7  | 75.9  | 72.4  | 74.8  | 78.8  | 75.9  | 83.6  | 82.2  | 84.9  | 87.9  | 84.8  | 83.9  |
| SE                                                                 | 1.8   | 1.8   | 1.8   | 1.8   | 1.8   | 1.8   | 1.6   | 2.6   | 1.7   | 2.7   | 1.9   | 1.9   | 2.2   | 1.0   | 1.0   | 0.9   |
| Bile duct surgery                                                  |       |       |       |       |       |       |       |       |       |       |       |       |       |       |       |       |
| Rate                                                               | 16.9  | 14.2  | 13.2  | 11.8  | 11.3  | 10.3  | 9.0   | 7.8   | 7.2   | 6.6   | 6.9   | 5.9   | 5.4   | 4.6   | 4.2   | 3.8   |
| SE                                                                 | 1.4   | 1.5   | 1.4   | 1.5   | 1.5   | 1.5   | 1.5   | 1.4   | 2.0   | 1.4   | 2.2   | 1.6   | 1.5   | 1.8   | 0.8   | 0.8   |
| Percutaneous transhepatic cholangiography                          |       |       |       |       |       |       |       |       |       |       |       |       |       |       |       |       |
| Rate                                                               | 5.0   | 5.2   | 4.4   | 4.3   | 4.5   | 4.5   | 4.1   | 4.2   | 3.9   | 4.7   | 4.5   | 4.2   | 4.7   | 4.1   | 3.9   | 3.8   |
| SE                                                                 | 0.4   | 0.5   | 0.3   | 0.2   | 0.2   | 0.3   | 0.3   | 0.3   | 0.2   | 0.4   | 0.3   | 0.2   | 0.3   | 0.3   | 0.1   | 0.1   |

Age-standardized rate of procedures per 100,000 United States residents. *SE*, standard error.

| <b>Supplementary Table 3: Age-standardized rate of biliary procedures for select ICD-9 codes</b> |      |      |      |      |      |      |      |      |      |      |      |      |      |      |      |      |
|--------------------------------------------------------------------------------------------------|------|------|------|------|------|------|------|------|------|------|------|------|------|------|------|------|
| Year                                                                                             | 98   | 99   | 00   | 01   | 02   | 03   | 04   | 05   | 06   | 07   | 08   | 09   | 10   | 11   | 12   | 13   |
| <b>Interventions for bile duct stones</b>                                                        |      |      |      |      |      |      |      |      |      |      |      |      |      |      |      |      |
| 51.88                                                                                            | 16.7 | 17.1 | 17.2 | 19.4 | 19.4 | 20.4 | 19.4 | 19.8 | 20.6 | 20.5 | 22.4 | 22.1 | 23.0 | 24.1 | 22.3 | 22.1 |
| 51.41                                                                                            | 5.2  | 4.2  | 3.9  | 3.5  | 3.3  | 2.9  | 2.8  | 2.3  | 2.1  | 1.8  | 1.8  | 1.6  | 1.3  | 1.1  | 0.9  | 0.8  |
| 51.96                                                                                            | 0.3  | 0.4  | 0.3  | 0.3  | 0.3  | 0.2  | 0.2  | 0.2  | 0.2  | 0.2  | 0.1  | 0.1  | 0.2  | 0.1  | 0.1  | 0.1  |
| <b>Therapeutic ERCP codes</b>                                                                    |      |      |      |      |      |      |      |      |      |      |      |      |      |      |      |      |
| 51.85                                                                                            | 28.3 | 29.9 | 29.6 | 34.0 | 34.3 | 36.0 | 33.7 | 35.1 | 36.4 | 35.2 | 39.0 | 38.6 | 39.6 | 40.5 | 37.3 | 36.5 |
| 51.87                                                                                            | 11.5 | 12.1 | 12.1 | 13.6 | 13.7 | 15.0 | 14.7 | 15.6 | 17.2 | 16.0 | 18.3 | 17.5 | 17.9 | 18.8 | 17.4 | 17.4 |
| 51.88                                                                                            | 16.7 | 17.1 | 17.2 | 19.4 | 19.4 | 20.4 | 19.4 | 19.8 | 20.6 | 20.5 | 22.4 | 22.1 | 23.0 | 24.1 | 22.3 | 22.1 |
| <b>Bile duct surgery</b>                                                                         |      |      |      |      |      |      |      |      |      |      |      |      |      |      |      |      |
| 51.3x                                                                                            | 4.0  | 3.4  | 3.1  | 2.8  | 2.5  | 2.3  | 2.1  | 1.8  | 1.5  | 1.5  | 1.5  | 1.2  | 1.2  | 0.9  | 0.8  | 0.8  |
| 51.4x                                                                                            | 7.0  | 5.7  | 5.4  | 4.7  | 4.5  | 4.0  | 3.8  | 3.2  | 3.1  | 2.7  | 2.6  | 2.4  | 2.0  | 1.8  | 1.6  | 1.4  |
| 51.5x                                                                                            | 5.1  | 4.2  | 4.1  | 3.6  | 3.5  | 3.2  | 2.5  | 2.3  | 2.0  | 1.8  | 2.2  | 1.7  | 1.6  | 1.3  | 1.3  | 1.1  |
| 51.7x                                                                                            | 0.8  | 0.8  | 0.7  | 0.7  | 0.8  | 0.7  | 0.7  | 0.6  | 0.6  | 0.6  | 0.7  | 0.6  | 0.6  | 0.6  | 0.5  | 0.5  |

Age-standardized rate of procedures per 100,000 United States residents by ICD-9-CM code or code family. See **Supplementary Table 1** for description of each code.

| <b>Supplementary Table 4: Trends in case fatality for biliary procedures</b> |     |     |     |     |     |     |     |     |     |     |     |     |     |     |     |     |
|------------------------------------------------------------------------------|-----|-----|-----|-----|-----|-----|-----|-----|-----|-----|-----|-----|-----|-----|-----|-----|
| Year                                                                         | 98  | 99  | 00  | 01  | 02  | 03  | 04  | 05  | 06  | 07  | 08  | 09  | 10  | 11  | 12  | 13  |
| Therapeutic ERCP                                                             | 1.8 | 1.6 | 1.5 | 1.4 | 1.5 | 1.4 | 1.4 | 1.4 | 1.1 | 1.1 | 1.0 | 1.0 | 0.9 | 0.8 | 0.8 | 1.0 |
| Bile duct surgery                                                            | 5.5 | 4.1 | 4.8 | 4.7 | 4.5 | 3.2 | 4.5 | 4.3 | 3.2 | 3.1 | 3.2 | 4.1 | 2.5 | 3.4 | 2.7 | 3.0 |
| Percutaneous transhepatic cholangiography                                    | 6.4 | 3.9 | 6.2 | 7.5 | 6.2 | 4.9 | 4.3 | 4.4 | 4.5 | 5.3 | 3.8 | 3.1 | 4.7 | 3.7 | 3.3 | 4.1 |

Case fatality calculated as in-hospital deaths per 100 discharges for principal procedures.

| <b>Supplementary Table 5: Trends in hospital length of stay for biliary procedures</b> |      |      |      |      |      |      |      |      |      |      |      |      |      |      |     |     |
|----------------------------------------------------------------------------------------|------|------|------|------|------|------|------|------|------|------|------|------|------|------|-----|-----|
| Year                                                                                   | 98   | 99   | 00   | 01   | 02   | 03   | 04   | 05   | 06   | 07   | 08   | 09   | 10   | 11   | 12  | 13  |
| Therapeutic ERCP                                                                       | 5.5  | 5.3  | 5.4  | 5.4  | 5.5  | 5.4  | 5.6  | 5.5  | 5.4  | 5.5  | 5.3  | 5.3  | 5.3  | 4.9  | 5.0 | 5.2 |
| Bile duct surgery                                                                      | 12.0 | 11.0 | 11.7 | 11.6 | 11.5 | 11.0 | 10.4 | 11.5 | 11.1 | 10.4 | 11.1 | 10.2 | 10.1 | 10.3 | 9.9 | 9.5 |
| Percutaneous transhepatic cholangiography                                              | 7.9  | 6.8  | 7.9  | 8.0  | 7.8  | 7.5  | 8.0  | 7.2  | 7.5  | 7.8  | 7.3  | 7.5  | 7.4  | 7.4  | 7.2 | 7.7 |

Length of stay (in days) for principal procedures.

**Supplementary Table 6: Trends in biliary procedures by age**

| Year                                             | 98   | 99   | 00   | 01   | 02   | 03   | 04   | 05   | 06   | 07   | 08   | 09   | 10   | 11   | 12   | 13   |
|--------------------------------------------------|------|------|------|------|------|------|------|------|------|------|------|------|------|------|------|------|
| <b>Therapeutic ERCP</b>                          |      |      |      |      |      |      |      |      |      |      |      |      |      |      |      |      |
| ≤ 44                                             | 12.0 | 13.1 | 13.6 | 15.1 | 16.2 | 17.5 | 17.3 | 17.0 | 19.3 | 18.4 | 21.0 | 21.2 | 21.8 | 22.8 | 21.7 | 21.4 |
| 45 - 64                                          | 12.9 | 14.1 | 14.5 | 14.4 | 16.6 | 18.2 | 17.6 | 18.8 | 20.3 | 19.6 | 22.7 | 22.8 | 24.6 | 25.6 | 25.2 | 25.4 |
| ≥ 65                                             | 27.5 | 27.8 | 27.3 | 31.6 | 30.8 | 32.6 | 31.1 | 33.4 | 34.2 | 34.3 | 37.2 | 36.9 | 38.4 | 40.7 | 40.8 | 41.4 |
| <b>Bile duct surgery</b>                         |      |      |      |      |      |      |      |      |      |      |      |      |      |      |      |      |
| ≤ 44                                             | 2.9  | 2.6  | 2.5  | 2.2  | 2.2  | 2.1  | 1.9  | 1.5  | 1.6  | 1.3  | 1.5  | 1.3  | 1.2  | 0.9  | 0.9  | 0.9  |
| 45 - 64                                          | 3.4  | 3.1  | 3.0  | 2.7  | 2.6  | 2.5  | 2.4  | 2.2  | 1.9  | 1.9  | 2.2  | 1.9  | 1.9  | 1.6  | 1.4  | 1.4  |
| ≥ 65                                             | 7.7  | 6.3  | 5.9  | 5.3  | 5.1  | 4.6  | 4.0  | 3.5  | 3.2  | 2.9  | 3.0  | 2.6  | 2.3  | 2.2  | 2.0  | 2.0  |
| <b>Percutaneous transhepatic cholangiography</b> |      |      |      |      |      |      |      |      |      |      |      |      |      |      |      |      |
| ≤ 44                                             | 0.5  | 0.6  | 0.4  | 0.5  | 0.4  | 0.5  | 0.4  | 0.5  | 0.5  | 0.5  | 0.5  | 0.4  | 0.6  | 0.4  | 0.5  | 0.4  |
| 45 - 64                                          | 1.1  | 1.3  | 1.1  | 1.1  | 1.1  | 1.2  | 1.2  | 1.3  | 1.2  | 1.5  | 1.5  | 1.4  | 1.6  | 1.5  | 1.5  | 1.4  |
| ≥ 65                                             | 2.6  | 2.4  | 2.1  | 2.2  | 2.4  | 2.2  | 2.0  | 2.1  | 2.0  | 2.5  | 2.2  | 2.3  | 2.4  | 2.3  | 2.1  | 2.3  |

Rate of procedures per 100,000 United States residents by age.

**Supplementary Table 7: Trends in biliary procedures by gender.**

| Year                                      | 98   | 99   | 00   | 01   | 02   | 03   | 04   | 05   | 06   | 07   | 08   | 09   | 10   | 11   | 12   | 13   |
|-------------------------------------------|------|------|------|------|------|------|------|------|------|------|------|------|------|------|------|------|
| Therapeutic ERCP                          |      |      |      |      |      |      |      |      |      |      |      |      |      |      |      |      |
| Male                                      | 23.0 | 23.7 | 23.4 | 26.4 | 26.2 | 28.2 | 27.0 | 28.1 | 29.2 | 28.8 | 31.4 | 31.4 | 33.2 | 34.8 | 34.0 | 34.0 |
| Female                                    | 39.0 | 40.7 | 40.5 | 45.7 | 45.5 | 47.6 | 45.3 | 46.5 | 49.6 | 46.7 | 52.1 | 50.8 | 51.7 | 53.1 | 50.7 | 49.8 |
| Bile duct surgery                         |      |      |      |      |      |      |      |      |      |      |      |      |      |      |      |      |
| Male                                      | 6.9  | 5.5  | 5.3  | 4.6  | 4.5  | 4.2  | 3.7  | 3.3  | 2.8  | 2.9  | 2.9  | 2.5  | 2.3  | 2.0  | 1.8  | 1.6  |
| Female                                    | 10.0 | 8.6  | 8.0  | 7.2  | 6.7  | 6.1  | 5.3  | 4.6  | 4.3  | 3.7  | 4.0  | 3.4  | 3.0  | 2.6  | 2.4  | 2.2  |
| Percutaneous transhepatic cholangiography |      |      |      |      |      |      |      |      |      |      |      |      |      |      |      |      |
| Male                                      | 2.3  | 2.6  | 2.1  | 2.1  | 2.3  | 2.1  | 2.0  | 2.0  | 1.8  | 2.3  | 2.3  | 2.1  | 2.3  | 2.0  | 2.0  | 1.9  |
| Female                                    | 2.7  | 2.6  | 2.2  | 2.2  | 2.3  | 2.3  | 2.1  | 2.2  | 2.1  | 2.4  | 2.2  | 2.1  | 2.4  | 2.1  | 1.9  | 1.9  |

Age-standardized rate of procedures per 100,000 United States residents by gender.

| Supplemental Table 8: Trends in biliary procedures by payer |      |      |      |      |      |      |      |      |      |      |      |      |      |      |      |      |
|-------------------------------------------------------------|------|------|------|------|------|------|------|------|------|------|------|------|------|------|------|------|
| Year                                                        | 98   | 99   | 00   | 01   | 02   | 03   | 04   | 05   | 06   | 07   | 08   | 09   | 10   | 11   | 12   | 13   |
| <b>Therapeutic ERCP</b>                                     |      |      |      |      |      |      |      |      |      |      |      |      |      |      |      |      |
| Medicare                                                    | 30.5 | 30.6 | 30.1 | 33.8 | 33.7 | 35.4 | 33.3 | 35.5 | 36.3 | 35.4 | 37.3 | 36.7 | 37.9 | 40.1 | 40.1 | 39.6 |
| Medicaid                                                    | 4.9  | 5.4  | 5.3  | 6.7  | 6.7  | 8.5  | 7.5  | 8.0  | 8.1  | 8.3  | 8.7  | 9.7  | 10.9 | 10.9 | 10.6 | 10.1 |
| Private Insurance                                           | 22.3 | 23.9 | 24.1 | 26.5 | 25.8 | 26.0 | 25.3 | 24.6 | 26.6 | 25.0 | 29.2 | 27.0 | 26.7 | 27.4 | 24.8 | 24.4 |
| Uninsured                                                   | 2.6  | 2.7  | 2.8  | 3.1  | 3.6  | 3.8  | 4.5  | 4.7  | 5.0  | 4.9  | 5.6  | 6.0  | 6.5  | 6.7  | 6.4  | 6.8  |
| Other                                                       | 1.5  | 1.4  | 1.4  | 1.8  | 2.0  | 2.0  | 1.7  | 1.8  | 2.6  | 2.1  | 2.7  | 2.5  | 2.7  | 2.6  | 2.8  | 2.7  |
| <b>Bile duct surgery</b>                                    |      |      |      |      |      |      |      |      |      |      |      |      |      |      |      |      |
| Medicare                                                    | 8.6  | 6.9  | 6.5  | 5.7  | 5.5  | 5.1  | 4.3  | 3.8  | 3.4  | 3.1  | 3.1  | 2.5  | 2.3  | 2.2  | 2.0  | 1.8  |
| Medicaid                                                    | 1.4  | 1.3  | 1.2  | 1.2  | 1.1  | 1.0  | 1.0  | 0.9  | 0.8  | 0.7  | 0.7  | 0.7  | 0.6  | 0.5  | 0.5  | 0.5  |
| Private Insurance                                           | 5.6  | 4.9  | 4.4  | 4.1  | 3.8  | 3.4  | 3.0  | 2.5  | 2.3  | 2.1  | 2.4  | 2.0  | 1.7  | 1.4  | 1.3  | 1.2  |
| Uninsured                                                   | 0.8  | 0.7  | 0.7  | 0.6  | 0.6  | 0.5  | 0.5  | 0.5  | 0.5  | 0.4  | 0.4  | 0.5  | 0.4  | 0.3  | 0.3  | 0.3  |
| Other                                                       | 0.5  | 0.4  | 0.5  | 0.3  | 0.3  | 0.3  | 0.2  | 0.2  | 0.2  | 0.2  | 0.3  | 0.2  | 0.2  | 0.2  | 0.1  | 0.1  |
| <b>Percutaneous transhepatic cholangiography</b>            |      |      |      |      |      |      |      |      |      |      |      |      |      |      |      |      |
| Medicare                                                    | 2.8  | 2.7  | 2.3  | 2.4  | 2.5  | 2.5  | 2.3  | 2.3  | 2.1  | 2.5  | 2.3  | 2.2  | 2.4  | 2.2  | 2.1  | 2.1  |
| Medicaid                                                    | 0.3  | 0.3  | 0.3  | 0.3  | 0.3  | 0.4  | 0.3  | 0.4  | 0.3  | 0.4  | 0.4  | 0.3  | 0.5  | 0.4  | 0.4  | 0.4  |
| Private Insurance                                           | 1.6  | 2.0  | 1.5  | 1.4  | 1.4  | 1.4  | 1.3  | 1.3  | 1.2  | 1.5  | 1.5  | 1.4  | 1.5  | 1.2  | 1.1  | 1.1  |
| Uninsured                                                   | 0.1  | 0.1  | 0.1  | 0.1  | 0.2  | 0.1  | 0.1  | 0.1  | 0.2  | 0.2  | 0.2  | 0.2  | 0.2  | 0.2  | 0.1  | 0.1  |
| Other                                                       | 0.1  | 0.1  | 0.1  | 0.1  | 0.1  | 0.1  | 0.1  | 0.1  | 0.1  | 0.1  | 0.1  | 0.1  | 0.1  | 0.1  | 0.1  | 0.1  |

Age-standardized rate of procedures per 100,000 United States residents by payer.



| <b>Supplemental Table 9: Trends in biliary procedures by hospital size</b> |      |      |      |      |      |      |      |      |      |      |      |      |      |      |      |      |
|----------------------------------------------------------------------------|------|------|------|------|------|------|------|------|------|------|------|------|------|------|------|------|
| Year                                                                       | 98   | 99   | 00   | 01   | 02   | 03   | 04   | 05   | 06   | 07   | 08   | 09   | 10   | 11   | 12   | 13   |
| <b>Therapeutic ERCP</b>                                                    |      |      |      |      |      |      |      |      |      |      |      |      |      |      |      |      |
| Small                                                                      | 5.6  | 6.4  | 5.1  | 5.2  | 5.9  | 6.0  | 6.0  | 5.5  | 9.6  | 6.7  | 8.7  | 7.0  | 7.2  | 6.9  | 8.5  | 8.0  |
| Medium                                                                     | 16.5 | 16.6 | 17.5 | 18.0 | 18.5 | 20.7 | 19.3 | 18.7 | 19.4 | 19.1 | 19.1 | 19.0 | 18.2 | 20.9 | 21.1 | 21.3 |
| Large                                                                      | 39.7 | 41.4 | 41.2 | 48.9 | 47.3 | 49.1 | 47.1 | 50.6 | 49.7 | 50.0 | 55.6 | 55.3 | 58.6 | 59.0 | 55.1 | 54.4 |
| <b>Bile duct surgery</b>                                                   |      |      |      |      |      |      |      |      |      |      |      |      |      |      |      |      |
| Small                                                                      | 2.3  | 1.7  | 1.4  | 1.2  | 1.3  | 1.0  | 0.9  | 0.8  | 0.8  | 0.7  | 0.6  | 0.6  | 0.5  | 0.5  | 0.5  | 0.4  |
| Medium                                                                     | 4.5  | 3.9  | 3.4  | 3.2  | 2.8  | 2.6  | 2.3  | 2.1  | 1.8  | 1.7  | 1.5  | 1.3  | 1.1  | 1.0  | 1.1  | 1.0  |
| Large                                                                      | 10.1 | 8.5  | 8.4  | 7.4  | 7.2  | 6.7  | 5.8  | 5.0  | 4.6  | 4.2  | 4.8  | 3.8  | 3.7  | 3.1  | 2.7  | 2.4  |
| <b>Percutaneous transhepatic cholangiography</b>                           |      |      |      |      |      |      |      |      |      |      |      |      |      |      |      |      |
| Small                                                                      | 0.5  | 0.3  | 0.3  | 0.4  | 0.4  | 0.3  | 0.3  | 0.3  | 0.3  | 0.3  | 0.2  | 0.4  | 0.5  | 0.3  | 0.4  | 0.3  |
| Medium                                                                     | 1.1  | 1.2  | 0.8  | 0.8  | 1.0  | 0.9  | 0.8  | 1.1  | 0.8  | 0.8  | 0.8  | 0.8  | 0.7  | 0.8  | 0.9  | 0.8  |
| Large                                                                      | 3.4  | 3.7  | 3.3  | 3.1  | 3.1  | 3.2  | 3.0  | 2.8  | 2.8  | 3.6  | 3.5  | 2.9  | 3.5  | 2.9  | 2.7  | 2.7  |

Age-standardized rate of procedures per 100,000 United States residents by hospital size. See text for description of classifications of hospital characteristics.

**Supplemental Table 10: Trends in biliary procedures by metropolitan status**

| Year                                             | 98   | 99   | 00   | 01   | 02   | 03   | 04   | 05   | 06   | 07   | 08   | 09   | 10   | 11   | 12   | 13   |
|--------------------------------------------------|------|------|------|------|------|------|------|------|------|------|------|------|------|------|------|------|
| <b>Therapeutic ERCP</b>                          |      |      |      |      |      |      |      |      |      |      |      |      |      |      |      |      |
| Non-metro                                        | 5.6  | 6.1  | 5.1  | 6.7  | 6.8  | 7.4  | 4.8  | 4.4  | 3.7  | 5.5  | 4.6  | 4.3  | 5.3  | 3.7  | 4.6  | 4.5  |
| Metro                                            | 56.2 | 58.3 | 58.7 | 65.4 | 64.9 | 68.5 | 67.6 | 70.3 | 74.9 | 70.3 | 78.9 | 76.9 | 78.8 | 83.2 | 80.1 | 79.3 |
| <b>Bile duct surgery</b>                         |      |      |      |      |      |      |      |      |      |      |      |      |      |      |      |      |
| Non-metro                                        | 3.0  | 2.3  | 2.5  | 2.0  | 1.9  | 1.7  | 1.3  | 1.0  | 0.9  | 0.8  | 0.7  | 0.6  | 0.5  | 0.5  | 0.4  | 0.3  |
| Metro                                            | 13.9 | 11.9 | 10.8 | 9.8  | 9.4  | 8.6  | 7.7  | 6.9  | 6.3  | 5.8  | 6.2  | 5.2  | 4.8  | 4.1  | 3.8  | 3.5  |
| <b>Percutaneous transhepatic cholangiography</b> |      |      |      |      |      |      |      |      |      |      |      |      |      |      |      |      |
| Non-metro                                        | 0.2  | 0.2  | 0.2  | 0.2  | 0.2  | 0.3  | 0.2  | 0.1  | 0.1  | 0.1  | 0.1  | 0.1  | 0.1  | 0.1  | 0.1  | 0.1  |
| Metro                                            | 4.8  | 5.0  | 4.1  | 4.1  | 4.4  | 4.2  | 4.0  | 4.1  | 3.8  | 4.6  | 4.4  | 4.0  | 4.5  | 3.9  | 3.8  | 3.7  |

Age-standardized rate of procedures per 100,000 United States residents by hospital size. See text for description of classifications of hospital characteristics. *Metro*, metropolitan-located hospital; *Non-metro*, non-metropolitan-located hospital.
